# Supplementary material
Source: publisher figshare collection journal article supplement (https://tandf.figshare.com/ndownloader/files/14001755)
Supplement: Supplementary file 1 [file 14001755]

### Supplementary material

**3D structure of a *Brucella melitensis* porin: molecular modelling in lipid membranes**

Maximilien Lopes-Rodriguesa,b,c,d, David Zanuyc, Carlos Alemánc,d, Catherine Michauxa,b,e*, Eric A. Perpètea,b,f*

**Corresponding author:**

E-mail: [maximilien.lopesrodrigues@unamur.be](mailto:maximilien.lopesrodrigues@unamur.be), Phone: 0032 81 72 45 57

a Laboratoire de Chimie Physique des Biomolécules, Unité de Chimie Physique Théorique et Structurale (UCPTS), University of Namur, Rue de Bruxelles, 61, 5000 Namur, Belgium.

b Namur Institute of Structured Matter, University of Namur, Rue de Bruxelles, 61, 5000 Namur, Belgium.

c Departament d’Enginyeria Química, EEBE, Universitat Politècnica de Catalunya, C/Eduard Maristany, 10-14, Ed. I2, 08019, Barcelona, Spain.

d Barcelona Research Center for Multiscale Science and Engineering, Universitat Politècnica de Catalunya, Eduard Maristany, 10-14, 08019, Barcelona, Spain.

e Namur Research Institute for Life Sciences, University of Namur, Rue de Bruxelles, 61, 5000 Namur, Belgium.

f Institute of Life-Earth-Environment, University of Namur, Rue de Bruxelles, 61, 5000 Namur, Belgium.

*C. Michaux and E.A. Perpète contributed equally to this work.

###
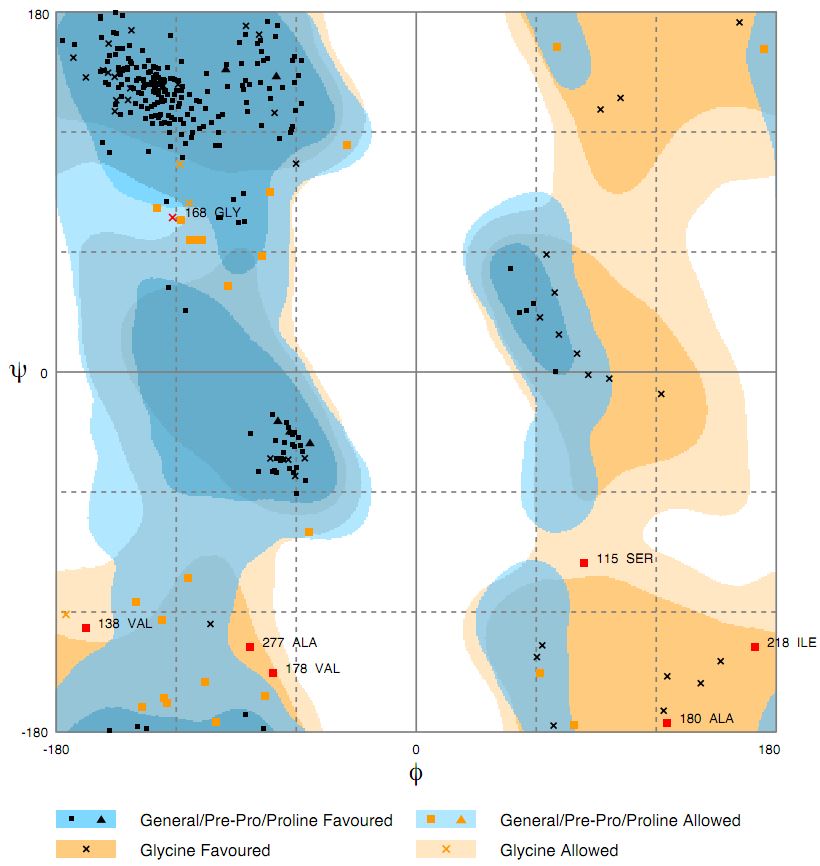


**Figure S1: Ramachandran plot of the Omp2a 3D structure built by RaptorX.**


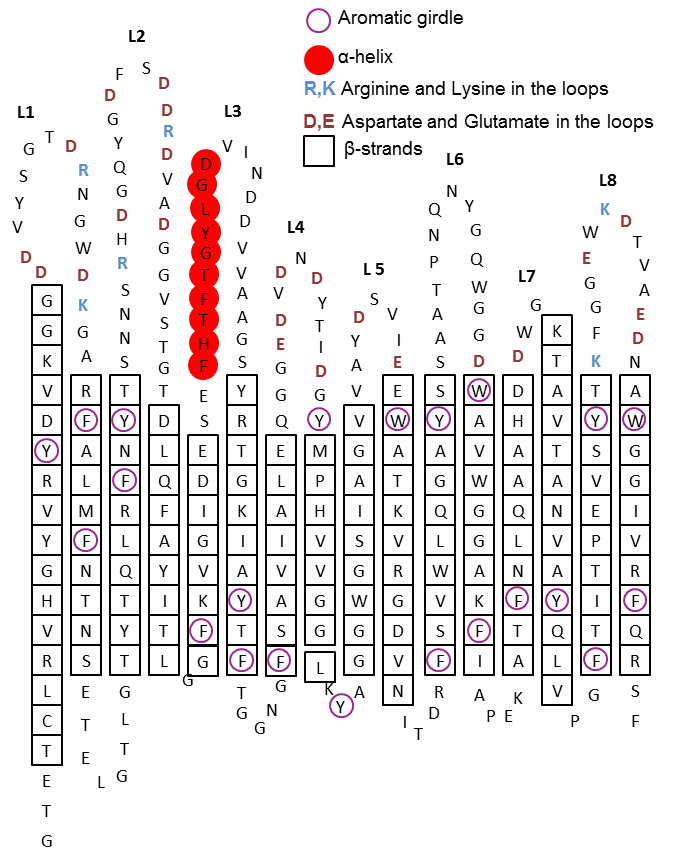


Figure S2: Omp2a topology of the predicted model of Omp2a.


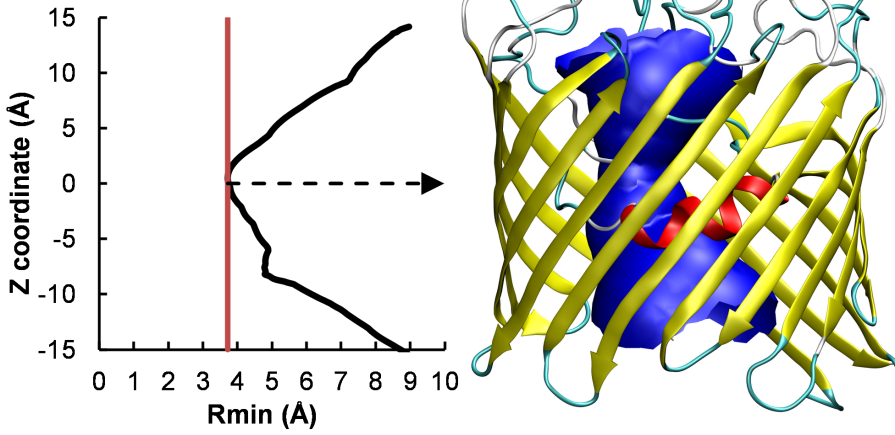


Figure S3: Plot of the minimum radius of the Omp2a channel along the main axis of the protein. The radius was calculated by HOLE using a water probe with a radius of 1.45 Å. The constriction zone of a radius of 3.72 Å is found at Z = 0 Å.


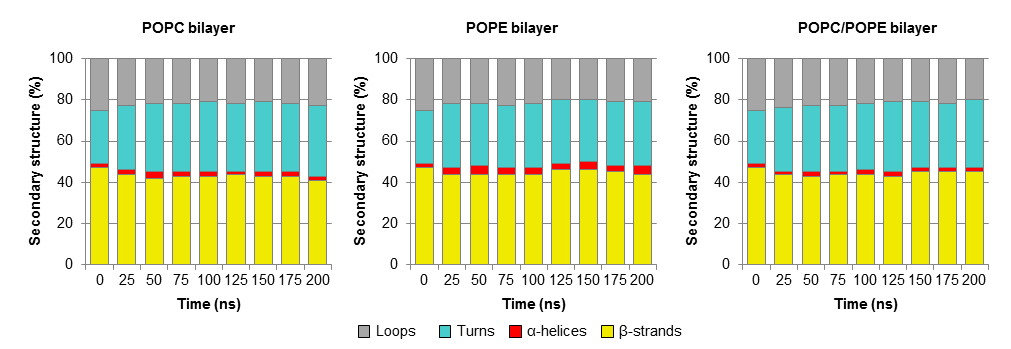


**Figure S4: Percentage of secondary structure for the three bilayers POPC, POPE and POPC/POPE. β-strands are represented in yellow, α-helices in red, turns in cyan and loops in grey. The secondary structure was calculated by DSSP for each monomer and averaged for each time.**
